# Supplementary material for: Four coordination polymers constructed by a novel octacarboxylate functionalized calix[4]arene ligand: syntheses, structures, and photoluminescence property
Source: Royal Society of Chemistry journal article supplement (doi:10.1039/c4ce01581a), 2014-09-24
Supplement: c4ce01581a1.pdf [file c4ce01581a1.pdf]

## Electronic supplementary information

### Four coordination polymers constructed by a novel octacarboxylate functionalized calix[4]arene ligand: syntheses, structures, and photoluminescent property

Hang Zhang,<sup>†</sup> Wei Jiang,<sup>†</sup> Jin Yang,<sup>\*,†</sup> Ying-Ying Liu,<sup>†</sup> Shuyan Song,<sup>\*,‡</sup> and Jian-Fang Ma<sup>\*,†</sup>

<sup>†</sup>Key Lab of Polyoxometalate Science, Department of Chemistry, Northeast Normal University, Changchun 130024, P. R. China

<sup>‡</sup>State Key Laboratory of Rare Earth Resource Utilization, Changchun Institute of Applied Chemistry, Chinese Academy of Sciences, Changchun 130022, P. R. China

**Table S1** Selected bond distances (Å) and angles (°) for **1**.

|                                               |           |                                                |           |
|-----------------------------------------------|-----------|------------------------------------------------|-----------|
| Zn(1)-O(24)                                   | 1.948(7)  | Zn(1)-O(17) <sup>#1</sup>                      | 1.958(5)  |
| Zn(1)-O(6) <sup>#2</sup>                      | 1.960(6)  | Zn(1)-O(12) <sup>#3</sup>                      | 1.987(5)  |
| Zn(2)-O(15)                                   | 1.928(6)  | Zn(2)-O(5)                                     | 2.004(6)  |
| Zn(2)-O(9) <sup>#4</sup>                      | 1.961(5)  | Zn(2)-O(3) <sup>#5</sup>                       | 2.114(12) |
| Zn(2)-O(1) <sup>#5</sup>                      | 2.273(11) | Zn(3)-O(18)                                    | 1.965(5)  |
| Zn(3)-O(19)                                   | 2.359(5)  | Zn(3)-O(21)                                    | 1.981(6)  |
| Zn(3)-O(12) <sup>#6</sup>                     | 2.108(5)  | Zn(3)-O(1W)                                    | 2.059(6)  |
| Zn(3)-O(2W)                                   | 2.094(8)  | O(24)-Zn(1)-O(17) <sup>#1</sup>                | 100.2(3)  |
| O(24)-Zn(1)-O(6) <sup>#2</sup>                | 101.5(3)  | O(17) <sup>#1</sup> -Zn(1)-O(6) <sup>#2</sup>  | 103.5(2)  |
| O(24)-Zn(1)-O(12) <sup>#3</sup>               | 110.0(4)  | O(17) <sup>#1</sup> -Zn(1)-O(12) <sup>#3</sup> | 108.2(2)  |
| O(6) <sup>#2</sup> -Zn(1)-O(12) <sup>#3</sup> | 129.6(2)  | O(15)-Zn(2)-O(9) <sup>#4</sup>                 | 122.2(3)  |
| O(15)-Zn(2)-O(5)                              | 107.4(2)  | O(15)-Zn(2)-O(3) <sup>#5</sup>                 | 104.1(5)  |
| O(9) <sup>#4</sup> -Zn(2)-O(5)                | 99.4(2)   | O(9) <sup>#4</sup> -Zn(2)-O(3) <sup>#5</sup>   | 128.0(5)  |
| O(5)-Zn(2)-O(3) <sup>#5</sup>                 | 87.0(3)   | O(15)-Zn(2)-O(2) <sup>#5</sup>                 | 104.0(4)  |
| O(9) <sup>#4</sup> -Zn(2)-O(2) <sup>#5</sup>  | 89.3(3)   | O(5)-Zn(2)-O(2) <sup>#5</sup>                  | 135.7(4)  |
| O(3) <sup>#5</sup> -Zn(2)-O(2) <sup>#5</sup>  | 55.2(4)   | O(18)-Zn(3)-O(21)                              | 165.5(2)  |
| O(18)-Zn(3)-O(1W)                             | 93.8(3)   | O(21)-Zn(3)-O(1W)                              | 89.3(3)   |

|                                 |           |                                  |            |
|---------------------------------|-----------|----------------------------------|------------|
| O(18)-Zn(3)-O(2W)               | 88.1(3)   | O(21)-Zn(3)-O(2W)                | 89.3(3)    |
| O(1W)-Zn(3)-O(2W)               | 177.3(3)  | O(18)-Zn(3)-O(12) <sup>#6</sup>  | 93.3(2)    |
| O(21)-Zn(3)-O(12) <sup>#6</sup> | 100.9(2)  | O(1W)-Zn(3)-O(12) <sup>#6</sup>  | 87.8(2)    |
| O(2W)-Zn(3)-O(12) <sup>#6</sup> | 90.2(3)   | O(18)-Zn(3)-O(19)                | 90.7(2)    |
| O(21)-Zn(3)-O(19)               | 75.03(19) | O(1W)-Zn(3)-O(19)                | 92.8(2)    |
| O(2W)-Zn(3)-O(19)               | 89.0(2)   | O(12) <sup>#6</sup> -Zn(3)-O(19) | 175.87(19) |

Symmetry transformations used to generate equivalent atoms: <sup>#1</sup> x+1, y, z; <sup>#2</sup> -x, -y, -z; <sup>#3</sup> x+1, y+1, z; <sup>#4</sup> -x-1, -y-1, -z; <sup>#5</sup> -x-1, -y, -z; <sup>#6</sup> x, y+1, z; <sup>#7</sup> x-1, y-1, z; <sup>#8</sup> x, y-1, z; <sup>#9</sup> x-1, y, z; <sup>#10</sup> -x-1, -y, -z+1.

**Table S2** Selected bond distances (Å) and angles (°) for **2**.

|                                              |           |                                               |          |
|----------------------------------------------|-----------|-----------------------------------------------|----------|
| Co(1)-O(5)                                   | 2.049(5)  | Co(1)-O(9)                                    | 2.131(5) |
| Co(1)-O(13)                                  | 2.135(6)  | Co(1)-O(3) <sup>#1</sup>                      | 2.055(5) |
| Co(1)-O(11) <sup>#2</sup>                    | 2.146(5)  | Co(1)-O(3W)                                   | 2.119(7) |
| Co(2)-O(11)                                  | 2.119(5)  | Co(2)-O(9) <sup>#1</sup>                      | 2.089(5) |
| Co(2)-O(2) <sup>#3</sup>                     | 2.066(6)  | Co(2)-O(1W)                                   | 2.070(6) |
| Co(2)-O(2W)                                  | 2.153(6)  | Co(2)-O(4W)                                   | 2.066(7) |
| O(5)-Co(1)-O(3) <sup>#1</sup>                | 173.9(2)  | O(5)-Co(1)-O(3W)                              | 96.5(3)  |
| O(3) <sup>#1</sup> -Co(1)-O(3W)              | 85.6(3)   | O(5)-Co(1)-O(9)                               | 90.6(2)  |
| O(3) <sup>#1</sup> -Co(1)-O(9)               | 88.3(2)   | O(3W)-Co(1)-O(9)                              | 169.0(3) |
| O(5)-Co(1)-O(13)                             | 87.1(2)   | O(3) <sup>#1</sup> -Co(1)-O(13)               | 87.2(2)  |
| O(3W)-Co(1)-O(13)                            | 88.3(3)   | O(9)-Co(1)-O(13)                              | 100.4(2) |
| O(5)-Co(1)-O(11) <sup>#2</sup>               | 95.7(2)   | O(3) <sup>#1</sup> -Co(1)-O(11) <sup>#2</sup> | 89.8(2)  |
| O(3W)-Co(1)-O(11) <sup>#2</sup>              | 94.9(3)   | O(9)-Co(1)-O(11) <sup>#2</sup>                | 76.0(2)  |
| O(13)-Co(1)-O(11) <sup>#2</sup>              | 175.5(2)  | O(2) <sup>#3</sup> -Co(2)-O(4W)               | 174.4(3) |
| O(2) <sup>#3</sup> -Co(2)-O(1W)              | 85.8(3)   | O(4W)-Co(2)-O(1W)                             | 93.2(3)  |
| O(2) <sup>#3</sup> -Co(2)-O(9) <sup>#1</sup> | 90.9(2)   | O(4W)-Co(2)-O(9) <sup>#1</sup>                | 94.7(3)  |
| O(1W)-Co(2)-O(9) <sup>#1</sup>               | 103.2(2)  | O(2) <sup>#3</sup> -Co(2)-O(11)               | 93.3(2)  |
| O(4W)-Co(2)-O(11)                            | 87.7(3)   | O(1W)-Co(2)-O(11)                             | 178.8(3) |
| O(9) <sup>#1</sup> -Co(2)-O(11)              | 77.49(19) | O(2) <sup>#3</sup> -Co(2)-O(2W)               | 86.0(3)  |
| O(4W)-Co(2)-O(2W)                            | 88.4(3)   | O(1W)-Co(2)-O(2W)                             | 88.2(2)  |
| O(9) <sup>#1</sup> -Co(2)-O(2W)              | 167.9(2)  | O(11)-Co(2)-O(2W)                             | 91.0(2)  |

Symmetry transformations used to generate equivalent atoms: <sup>#1</sup> -x+1, -x+y+1, -z+4/3; <sup>#2</sup> -x+1, -x+y, -z+4/3; <sup>#3</sup> x, y+1, z; <sup>#4</sup> y, x, -z+1; <sup>#5</sup> x, y-1, z.

**Table S3** Selected bond distances (Å) and angles (°) for **3**.

|                                              |          |                                               |          |
|----------------------------------------------|----------|-----------------------------------------------|----------|
| Ni(1)-O(6)                                   | 2.037(6) | Ni(1)-O(9)                                    | 2.101(7) |
| Ni(1)-O(13)                                  | 2.111(7) | Ni(1)-O(2) <sup>#1</sup>                      | 2.040(7) |
| Ni(1)-O(12) <sup>#2</sup>                    | 2.134(7) | Ni(1)-O(3W)                                   | 2.070(8) |
| Ni(2)-O(12)                                  | 2.086(7) | Ni(2)-O(9) <sup>#1</sup>                      | 2.062(6) |
| Ni(2)-O(3) <sup>#3</sup>                     | 2.038(8) | Ni(2)-O(1W)                                   | 2.054(7) |
| Ni(2)-O(2W)                                  | 2.114(7) | Ni(2)-O(4W)                                   | 2.050(9) |
| O(6)-Ni(1)-O(2) <sup>#1</sup>                | 173.9(3) | O(6)-Ni(1)-O(3W)                              | 95.8(3)  |
| O(2) <sup>#1</sup> -Ni(1)-O(3W)              | 85.4(3)  | O(6)-Ni(1)-O(9)                               | 90.8(3)  |
| O(2) <sup>#1</sup> -Ni(1)-O(9)               | 89.0(3)  | O(3W)-Ni(1)-O(9)                              | 168.8(3) |
| O(6)-Ni(1)-O(13)                             | 86.0(3)  | O(2) <sup>#1</sup> -Ni(1)-O(13)               | 88.0(3)  |
| O(3W)-Ni(1)-O(13)                            | 89.3(3)  | O(9)-Ni(1)-O(13)                              | 100.2(3) |
| O(6)-Ni(1)-O(12) <sup>#2</sup>               | 95.5(3)  | O(2) <sup>#1</sup> -Ni(1)-O(12) <sup>#2</sup> | 90.4(3)  |
| O(3W)-Ni(1)-O(12) <sup>#2</sup>              | 94.1(3)  | O(9)-Ni(1)-O(12) <sup>#2</sup>                | 76.3(3)  |
| O(13)-Ni(1)-O(12) <sup>#2</sup>              | 176.1(3) | O(3) <sup>#3</sup> -Ni(2)-O(4W)               | 174.2(3) |
| O(3) <sup>#3</sup> -Ni(2)-O(1W)              | 84.8(4)  | O(4W)-Ni(2)-O(1W)                             | 93.3(4)  |
| O(3) <sup>#3</sup> -Ni(2)-O(9) <sup>#1</sup> | 91.2(3)  | O(4W)-Ni(2)-O(9) <sup>#1</sup>                | 94.6(3)  |
| O(1W)-Ni(2)-O(9) <sup>#1</sup>               | 101.5(3) | O(3) <sup>#3</sup> -Ni(2)-O(12)               | 94.2(3)  |
| O(4W)-Ni(2)-O(12)                            | 87.7(3)  | O(1W)-Ni(2)-O(12)                             | 179.0(4) |
| O(9) <sup>#1</sup> -Ni(2)-O(12)              | 78.2(2)  | O(3) <sup>#3</sup> -Ni(2)-O(2W)               | 85.8(3)  |
| O(4W)-Ni(2)-O(2W)                            | 88.6(4)  | O(1W)-Ni(2)-O(2W)                             | 88.4(3)  |
| O(9) <sup>#1</sup> -Ni(2)-O(2W)              | 169.4(3) | O(12)-Ni(2)-O(2W)                             | 91.9(3)  |

Symmetry transformations used to generate equivalent atoms: <sup>#1</sup> -x+1, -x+y+1, -z+4/3; <sup>#2</sup> -x+1, -x+y, -z+4/3; <sup>#3</sup> x, y+1, z; <sup>#4</sup> y, x, -z+1; <sup>#5</sup> x, y-1, z.

**Table S4** Selected bond distances (Å) and angles (°) for **4**.

|                                                |          |                                                |          |
|------------------------------------------------|----------|------------------------------------------------|----------|
| Mn(1)-O(7)                                     | 2.332(5) | Mn(1)-O(8)                                     | 2.233(4) |
| Mn(1)-O(10) <sup>#1</sup>                      | 2.098(4) | Mn(1)-O(16) <sup>#2</sup>                      | 2.112(5) |
| Mn(1)-O(13) <sup>#3</sup>                      | 2.142(5) | Mn(1)-O(23) <sup>#4</sup>                      | 2.174(5) |
| Mn(2)-O(17)                                    | 2.085(6) | Mn(2)-O(19)                                    | 2.117(5) |
| Mn(2)-O(25)                                    | 2.160(5) | Mn(2)-O(6W)                                    | 2.205(5) |
| Mn(2)-O(23) <sup>#5</sup>                      | 2.333(5) | Mn(2)-O(22) <sup>#5</sup>                      | 2.355(6) |
| Mn(3)-O(5)                                     | 2.109(5) | Mn(3)-O(1W)                                    | 2.154(5) |
| Mn(3)-O(2W)                                    | 2.190(7) | Mn(3)-O(3W)                                    | 2.149(5) |
| Mn(3)-O(4W)                                    | 2.225(7) | Mn(3)-O(5W)                                    | 2.137(6) |
| O(10) <sup>#1</sup> -Mn(1)-O(16) <sup>#2</sup> | 102.3(2) | O(10) <sup>#1</sup> -Mn(1)-O(13) <sup>#3</sup> | 89.3(2)  |
| O(16) <sup>#2</sup> -Mn(1)-O(13) <sup>#3</sup> | 81.6(2)  | O(10) <sup>#1</sup> -Mn(1)-O(23) <sup>#4</sup> | 88.4(2)  |

|                                                |            |                                                |            |
|------------------------------------------------|------------|------------------------------------------------|------------|
| O(16) <sup>#2</sup> -Mn(1)-O(23) <sup>#4</sup> | 90.2(2)    | O(13) <sup>#3</sup> -Mn(1)-O(23) <sup>#4</sup> | 170.84(19) |
| O(10) <sup>#1</sup> -Mn(1)-O(8)                | 103.38(19) | O(16) <sup>#2</sup> -Mn(1)-O(8)                | 154.2(2)   |
| O(13) <sup>#3</sup> -Mn(1)-O(8)                | 96.2(2)    | O(23) <sup>#4</sup> -Mn(1)-O(8)                | 92.93(19)  |
| O(10) <sup>#1</sup> -Mn(1)-O(7)                | 160.51(19) | O(16) <sup>#2</sup> -Mn(1)-O(7)                | 97.4(2)    |
| O(13) <sup>#3</sup> -Mn(1)-O(7)                | 95.2(2)    | O(23) <sup>#4</sup> -Mn(1)-O(7)                | 89.8(2)    |
| O(8)-Mn(1)-O(7)                                | 57.06(17)  | O(17)-Mn(2)-O(19)                              | 140.1(2)   |
| O(17)-Mn(2)-O(25)                              | 86.8(2)    | O(19)-Mn(2)-O(25)                              | 88.7(2)    |
| O(17)-Mn(2)-O(6W)                              | 87.2(2)    | O(19)-Mn(2)-O(6W)                              | 91.6(2)    |
| O(25)-Mn(2)-O(6W)                              | 170.2(2)   | O(17)-Mn(2)-O(23) <sup>#5</sup>                | 85.79(18)  |
| O(19)-Mn(2)-O(23) <sup>#5</sup>                | 134.07(18) | O(25)-Mn(2)-O(23) <sup>#5</sup>                | 95.03(19)  |
| O(6W)-Mn(2)-O(23) <sup>#5</sup>                | 91.8(2)    | O(17)-Mn(2)-O(22) <sup>#5</sup>                | 140.2(2)   |
| O(19)-Mn(2)-O(22) <sup>#5</sup>                | 79.65(19)  | O(25)-Mn(2)-O(22) <sup>#5</sup>                | 96.2(2)    |
| O(6W)-Mn(2)-O(22) <sup>#5</sup>                | 93.6(2)    | O(23) <sup>#5</sup> -Mn(2)-O(22) <sup>#5</sup> | 54.43(18)  |
| O(5)-Mn(3)-O(5W)                               | 96.3(2)    | O(5)-Mn(3)-O(3W)                               | 91.5(2)    |
| O(5W)-Mn(3)-O(3W)                              | 171.8(2)   | O(5)-Mn(3)-O(1W)                               | 172.5(3)   |
| O(5W)-Mn(3)-O(1W)                              | 88.9(2)    | O(3W)-Mn(3)-O(1W)                              | 83.0(2)    |
| O(5)-Mn(3)-O(2W)                               | 91.2(3)    | O(5W)-Mn(3)-O(2W)                              | 89.8(3)    |
| O(3W)-Mn(3)-O(2W)                              | 92.4(2)    | O(1W)-Mn(3)-O(2W)                              | 93.8(2)    |
| O(5)-Mn(3)-O(4W)                               | 86.4(3)    | O(5W)-Mn(3)-O(4W)                              | 90.6(4)    |
| O(3W)-Mn(3)-O(4W)                              | 87.5(2)    | O(1W)-Mn(3)-O(4W)                              | 88.3(3)    |
| O(2W)-Mn(3)-O(4W)                              | 177.6(2)   |                                                |            |

Symmetry transformations used to generate equivalent atoms: <sup>#1</sup> x+1, y, z; <sup>#2</sup> x+1, y, z-1; <sup>#3</sup> -x+1, -y, -z; <sup>#4</sup> -x+1, -y+1, -z; <sup>#5</sup> -x, -y+1, -z+1; <sup>#6</sup> x-1, y, z; <sup>#7</sup> x-1, y, z+1.

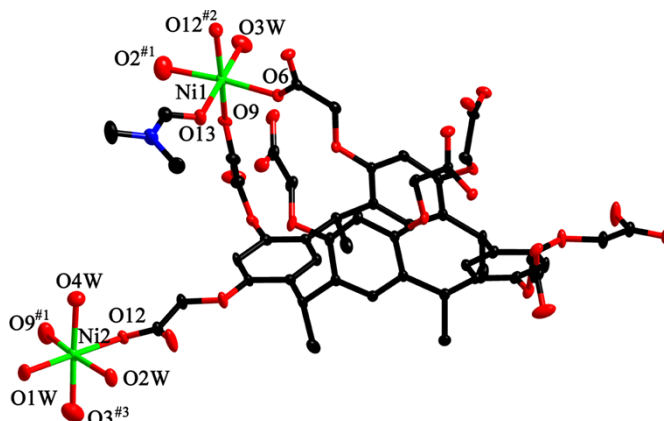

**Fig. S1** Coordination spheres surrounding Ni(II) ions in **3**.

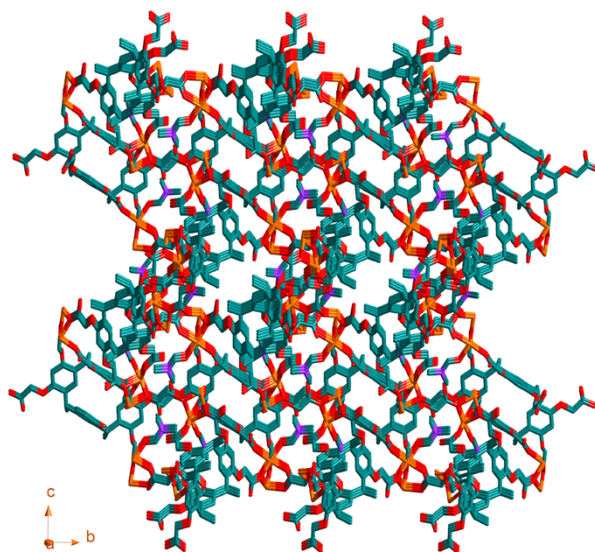

**Fig. S2** View of the 3D frameworks of **2** and **3**.

**Fig. S3** View of the 3D framework of **4**.

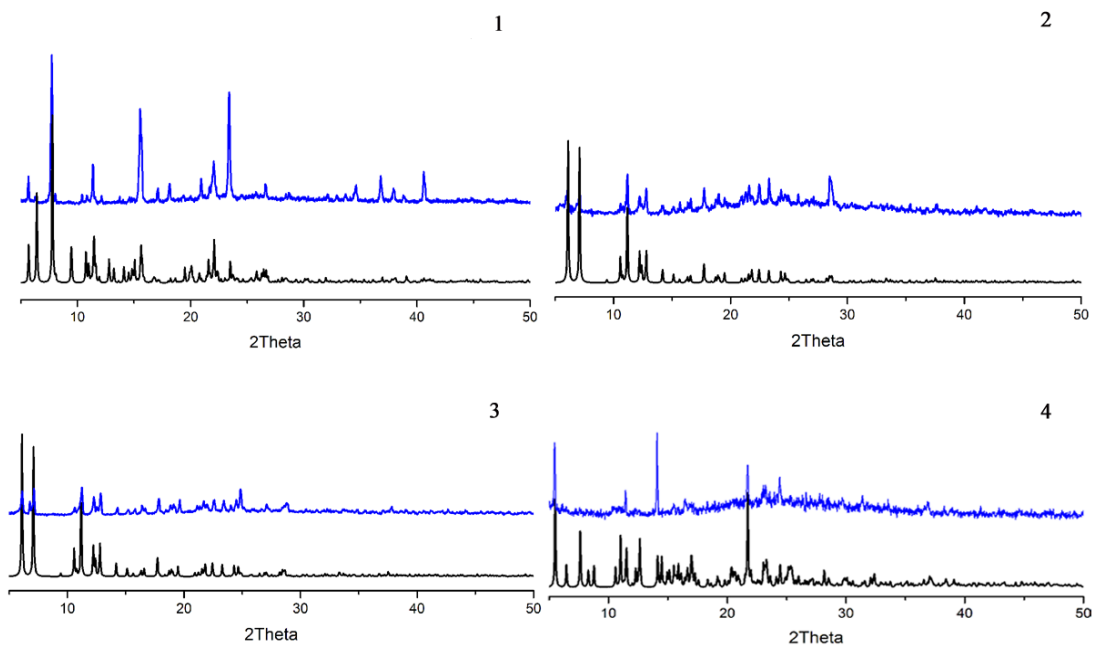

**Fig. S4** The simulated (black) and experimental (blue) PXRD patterns for compounds 1-4.

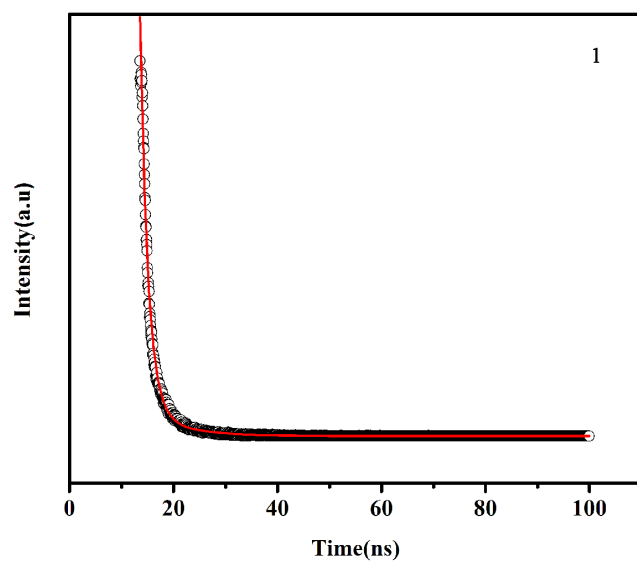

**Fig. S5** Luminescence decay curve for compound 1 (the black circles represent experimental data, and the solid red line represent fitting result).

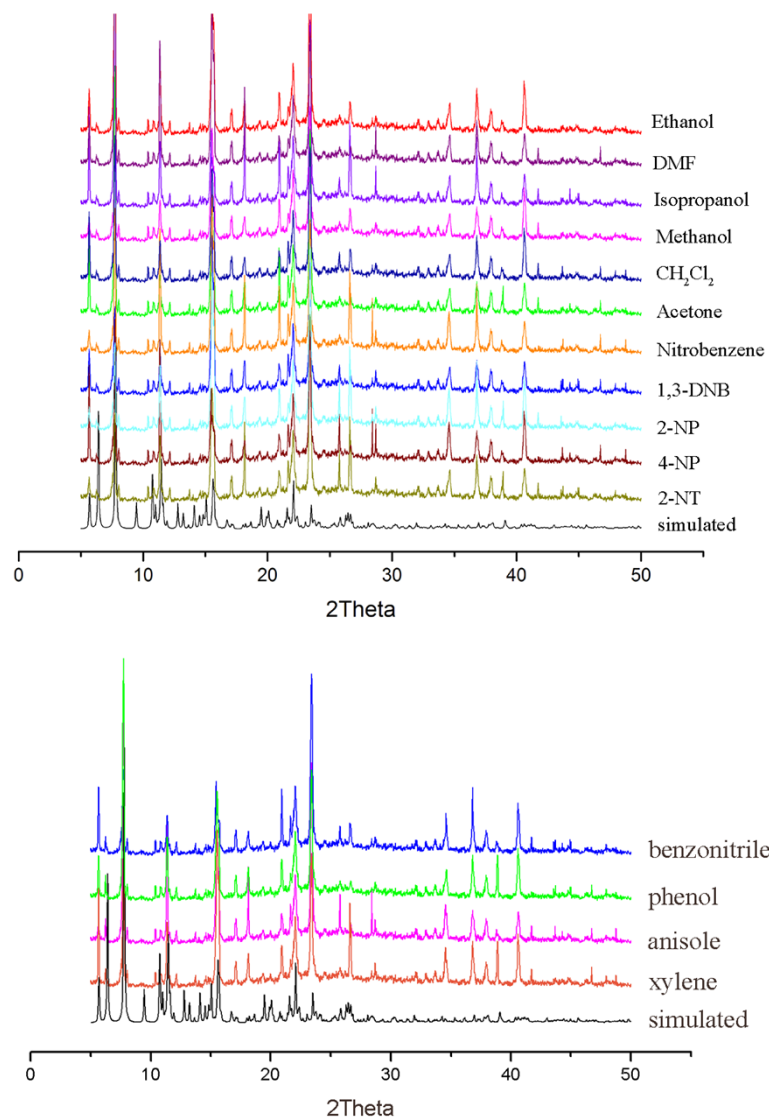

**Fig. S6** PXRD patterns of **1** in various solvents and the simulated one.
